# Supplementary material
Source: PubMed Central journal article supplement (PMC5042663)
Supplement: ASN.2015070811SupplementaryData.pdf [file ASN.2015070811SupplementaryData.pdf]

## SUPPLEMENTARY DATA

**Supplementary Table 1. Histology of surveillance biopsies at 1 year after Transplantation**

|     |         | Conventional KTx<br>(n=981) |
|-----|---------|-----------------------------|
| g   | None    | 92.9% (n = 911)             |
|     | Mild    | 5.3% (n = 52)               |
|     | Mod-Sev | 1.8% (n = 18)               |
| i   | None    | 85.3% (n = 836)             |
|     | Mild    | 8.8% (n = 86)               |
|     | Mod-Sev | 4.8% (n = 58)               |
| t   | None    | 84.9% (n = 832)             |
|     | Mild    | 9.2% (n = 90)               |
|     | Mod-Sev | 5.9% (n = 58)               |
| v   | None    | 99.5% (n = 970)             |
|     | Mild    | 0.5% (n = 5)                |
|     | Mod-Sev | 0% (n = 0)                  |
| ah  | None    | 76.4% (n = 720)             |
|     | Mild    | 19.3% (n = 182)             |
|     | Mod-Sev | 4.2% (n = 40)               |
| cg  | None    | 96.4% (n = 948)             |
|     | Mild    | 1.7% (n = 14)               |
|     | Mod-Sev | 1.8% (n = 18)               |
| ci  | None    | 49.8% (n = 490)             |
|     | Mild    | 36.9% (n = 363)             |
|     | Mod-Sev | 13.2% (n = 130)             |
| ct  | None    | 36.1% (n = 354)             |
|     | Mild    | 51.6% (n = 506)             |
|     | Mod-Sev | 12.3% (n = 121)             |
| cv  | None    | 58.6% (n = 574)             |
|     | Mild    | 32.4% (n = 318)             |
|     | Mod-Sev | 9.0% (n = 88)               |
| C4d | None    | 95.0% (n = 132)             |
|     | Mild    | 2.2% (n = 3)                |
|     | Mod-Sev | 2.8% (n = 4)                |
| mm  | None    | 90.5% (n = 380)             |
|     | Mild    | 8.5% (n = 36)               |
|     | Mod-Sev | 1.0% (n = 4)                |
| ptc | None    | 92.2% (n = 141)             |
|     | Mild    | 5.9% (n = 9)                |
|     | Mod-Sev | 1.9% (n = 3)                |

Mild is defined as a Banff score of 1 and Moderate to Severe (Mod-Sev) is a Banff score of 2 or 3. Where n<981, full data was not available.

## Supplementary Table 2. Univariate Cox Regression analysis for Death

### Censored Graft Failure Univariate Analysis

| Variable        | N   | All variables     |                  |
|-----------------|-----|-------------------|------------------|
|                 |     | HR (95% CI)       | P-value          |
| g <sup>#</sup>  | 981 | 2.37 (1.76, 3.19) | <b>&lt;0.001</b> |
| i <sup>#</sup>  | 981 | 1.31 (1.03, 1.67) | <b>0.03</b>      |
| t <sup>#</sup>  | 981 | 1.19 (0.92, 1.54) | 0.18             |
| ah <sup>#</sup> | 981 | 1.14 (0.85, 1.52) | 0.39             |
| cg <sup>#</sup> | 981 | 1.55 (1.15, 2.09) | <b>0.004</b>     |
| ci <sup>#</sup> | 981 | 1.60 (1.29, 1.97) | <b>&lt;0.001</b> |
| ct <sup>#</sup> | 981 | 1.46 (1.14, 1.85) | <b>0.002</b>     |
| cv <sup>#</sup> | 981 | 1.00 (0.76, 1.31) | 0.98             |
| mm <sup>#</sup> | 981 | 1.59 (1.23, 2.05) | <b>&lt;0.001</b> |
| C2 NDSA y/n     | 622 | 2.10 (1.09, 4.03) | <b>0.03</b>      |
| C2 NDSA n: 0    | 622 | 1                 | 0.08             |
| ≤3              |     | 2.06 (0.93, 4.56) |                  |
| 4+              |     | 2.16 (0.87, 5.32) |                  |
| C2 NDSA peak: 0 | 622 | 1                 | 0.08             |
| <1000           |     | 2.24 (1.02, 4.90) |                  |
| 1000+           |     | 1.92 (0.77, 4.80) |                  |
| C2 NDSA cum: 0  | 622 | 1                 | 0.08             |
| ≤2000           |     | 2.14 (0.93, 4.92) |                  |
| >2000           |     | 2.05 (0.87, 4.84) |                  |
| C2 DSA y/n      | 622 | 2.70 (1.34, 5.45) | <b>0.006</b>     |
| C2 DSA n: 0     | 622 | 1                 | <b>&lt;0.001</b> |
| 1               |     | 1.58 (0.59, 4.19) |                  |
| 2+              |     | 5.88 (2.40, 14.4) |                  |
| C2 DSA peak: 0  | 622 | 1                 | <b>0.02</b>      |
| ≤500            |     | 2.52 (0.76, 8.35) |                  |
| >500            |     | 2.78 (1.24, 6.25) |                  |
| C2 DSA cum: 0   | 622 | 1                 | <b>&lt;0.001</b> |
| ≤800            |     | 1.20 (0.35, 4.20) |                  |
| >800            |     | 4.45 (2.03, 9.74) |                  |
| C1 NDSA y/n     | 622 | 0.96 (0.52, 1.76) | 0.89             |
| C1 NDSA n: 0    | 622 | 1                 | 0.97             |
| ≤3              |     | 0.91 (0.39, 2.09) |                  |
| 4+              |     | 1.01 (0.46, 2.20) |                  |
| C1 NDSA peak: 0 | 622 | 1                 | 0.96             |
| <1100           |     | 0.89 (0.37, 2.10) |                  |
| 1100+           |     | 1.02 (0.48, 2.16) |                  |
| C1 NDSA cum: 0  | 622 | 1                 | 0.87             |
| <2600           |     | 0.83 (0.36, 1.92) |                  |
| 2600+           |     | 1.08 (0.51, 2.30) |                  |
| C1 DSA y/n      | 622 | 0.96 (0.31, 2.97) | 0.94             |

<sup>#</sup>HR per unit of Banff score.
